# Supplementary material for: Microbial nutrient limitation in Arctic lakes in a permafrost landscape of southwest Greenland
Source: Copernicus journal article supplement (doi:10.5194/bg-13-365-2016), 2016-01-19
Supplement: Supplementary file [file bg-13-365-2016-supplement.pdf]

Supplement of Biogeosciences, 13, 365–374, 2016  
<http://www.biogeosciences.net/13/365/2016/>  
doi:10.5194/bg-13-365-2016-supplement  
© Author(s) 2016. CC Attribution 3.0 License.

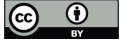

Biogeosciences  Open Access

*Supplement of*

## **Microbial nutrient limitation in Arctic lakes in a permafrost landscape of southwest Greenland**

**B. Burpee et al.**

*Correspondence to:* B. Burpee ([benjaminburpee@gmail.com](mailto:benjaminburpee@gmail.com))

The copyright of individual parts of the supplement might differ from the CC-BY 3.0 licence.

S1. Epilimnetic Water Quality and Nutrient Data for Summer 2013.

| Lake   | Depth<br>(m) | June          |     |                              |                             |                             |                              |        | July          |     |                              |                             |                             |                              |        |
|--------|--------------|---------------|-----|------------------------------|-----------------------------|-----------------------------|------------------------------|--------|---------------|-----|------------------------------|-----------------------------|-----------------------------|------------------------------|--------|
|        |              | Temp<br>(° C) | pH  | DIN<br>(µg L <sup>-1</sup> ) | TN<br>(µg L <sup>-1</sup> ) | TP<br>(µg L <sup>-1</sup> ) | DOC<br>(mg L <sup>-1</sup> ) | DIN:TP | Temp<br>(° C) | pH  | DIN<br>(µg L <sup>-1</sup> ) | TN<br>(µg L <sup>-1</sup> ) | TP<br>(µg L <sup>-1</sup> ) | DOC<br>(mg L <sup>-1</sup> ) | DIN:TP |
| SS10   | 29.4         | 6.1           | 6.0 | 2                            | 215                         | 2                           | 4                            | 1.0    | 13.3          | 6.5 | 9                            | 280                         | <2                          | 4                            | 9.0    |
| SS12   | 20           | 7.4           | 5.9 | 17                           | 296                         | 5                           | 6                            | 3.4    | 13.6          | 6.9 | 9                            | 292                         | NA                          | 7                            | NA     |
| SS1381 | 21           | 10.3          | 6.9 | 5                            | 742                         | 6                           | 26                           | 0.83   | 15.1          | 7.4 | 20                           | 942                         | NA                          | 30                           | NA     |
| SS15   | 32           | 7.9           | 7.2 | 2                            | 236                         | 4                           | 6                            | 0.50   | 13.5          | 7.0 | 13                           | 243                         | 3                           | 6                            | 4.3    |
| SS1590 | 19           | 7.2           | 6.9 | 11                           | 728                         | 4                           | 20                           | 2.8    | 14.5          | 7.1 | 18                           | 932                         | 4                           | 24                           | 4.5    |
| SS16   | 13           | 5.5           | 6.3 | 2                            | 439                         | 12                          | 10                           | 0.17   | 13.4          | 7.2 | 7                            | 443                         | 7                           | 11                           | 1.0    |
| SS16B  | 9.8          | 9             | 6.4 | 7                            | 580                         | 8                           | 9                            | 0.88   | 14.1          | 6.4 | 6                            | 610                         | 11                          | 10                           | 0.55   |
| SS18   | 11           | 10.4          | 6.6 | 6                            | 648                         | 4                           | 20                           | 1.5    | 17.4          | 6.6 | 16                           | 803                         | 6                           | 21                           | 2.7    |
| SS2    | 12           | 6.2           | 6.6 | 15                           | 627                         | 3                           | 24                           | 5.0    | 14.4          | 7.6 | 10                           | 709                         | <2                          | 28                           | 10     |
| SS21   | 30           | 7.6           | 6.8 | 4                            | 233                         | 11                          | 5                            | 0.36   | 13.1          | 6.7 | 9                            | 329                         | 5                           | 5                            | 1.8    |
| SS32   | 21           | 5.9           | 6.1 | 4                            | 302                         | 4                           | 5                            | 1.0    | 9.1           | 6.7 | 13                           | 268                         | 5                           | 5                            | 2.6    |
| SS56   | 14           | 8.3           | 6.8 | 25                           | 538                         | 5                           | 15                           | 5.0    | 13.7          | 7.1 | 19                           | 651                         | <2                          | 16                           | 19     |
| SS57   | 36           | 7.2           | 6.9 | 6                            | 265                         | <2                          | 7                            | 6.0    | 12.6          | 7.1 | 8                            | 709                         | <2                          | 8                            | 8.0    |
| SS66   | 29           | 5.5           | 6.6 | 2                            | 260                         | <2                          | 5                            | 2.0    | 12.7          | 6.9 | 22                           | 206                         | <2                          | 5                            | 22     |
| SS67   | 8            | 11            | 5.8 | 4                            | 470                         | <2                          | 10                           | 4.0    | 12.8          | 6.5 | 19                           | 449                         | NA                          | 11                           | NA     |
| SS68   | 30           | 8.9           | 6.9 | 2                            | 366                         | <2                          | 9                            | 2.0    | 15.1          | 7.6 | 11                           | 267                         | 4                           | 9                            | 2.8    |
| SS8    | 11           | 11.6          | 7.2 | 2                            | 892                         | 4                           | 31                           | 0.50   | 15.6          | 7.2 | 14                           | 1122                        | 8                           | 37                           | 1.8    |
| SS85   | 13           | 11.5          | 7.1 | 6                            | 1042                        | <2                          | 35                           | 6.0    | 15.4          | 7.3 | 15                           | 1132                        | <2                          | 40                           | 15     |

|       |    |     |     |    |     |    |    |      |      |     |    |     |    |    |      |
|-------|----|-----|-----|----|-----|----|----|------|------|-----|----|-----|----|----|------|
| SS86  | 13 | 5.3 | 6.9 | 2  | 588 | <2 | 13 | 2.0  | 9.5  | 7.3 | 4  | 902 | 3  | 13 | 1.3  |
| SS901 | 15 | 7.2 | 6.3 | 5  | 368 | 4  | 8  | 1.3  | 13   | 6.9 | 10 | 442 | 4  | 8  | 2.5  |
| SS903 | 29 | 6.8 | 6.8 | 2  | 388 | 10 | 8  | 0.20 | 12.3 | 7.7 | 13 | 598 | 7  | 8  | 1.9  |
| SS904 | 18 | 6   | 6.1 | 2  | 220 | 3  | 5  | 0.67 | 13.4 | 6.7 | 7  | 263 | 10 | 5  | 0.70 |
| SS905 | 20 | 5.7 | 6.3 | 2  | 178 | <2 | 4  | 2.0  | 13.8 | 6.9 | 4  | 197 | 3  | 4  | 1.3  |
| SS906 | 18 | 8.1 | 6.3 | 10 | 590 | 5  | 5  | 2.0  | 13.6 | 6.9 | 8  | 499 | 9  | 6  | 0.89 |

S2. Lake Nutrient Limitation and C acquisition as indicated by mean vector angle and length for both months.

| Lake   | Month | Epilimnia    |               | Hypolimnia   |               |
|--------|-------|--------------|---------------|--------------|---------------|
|        |       | Vector Angle | Vector Length | Vector Angle | Vector Length |
| SS10   | June  | -3           | 6.7           | -1           | 2.5           |
| SS10   | July  | NA           | NA            | NA           | NA            |
| SS12   | June  | 11           | 40.2          | 15           | 8.2           |
| SS12   | July  | -22          | 35.8          | 4            | 1.5           |
| SS1381 | June  | 35           | 1.6           | NA           | NA            |
| SS1381 | July  | 40           | 2.6           | 43           | 62.8          |
| SS15   | June  | 11           | 7.0           | 16           | 3.2           |
| SS15   | July  | -21          | 6.3           | 6            | 7.2           |
| SS1590 | June  | 23           | 4.6           | 33           | 0.8           |
| SS1590 | July  | 12           | 3.2           | 31           | 17.3          |
| SS16   | June  | 18           | 7.4           | 8            | 6.8           |
| SS16   | July  | 8            | 2.3           | 20           | 1.4           |
| SS16B  | June  | 31           | 5.5           | 37           | 1.7           |
| SS16B  | July  | 15           | 5.0           | 36           | 3.2           |
| SS18   | June  | 29           | 2.3           | 38           | 1.1           |
| SS18   | July  | 4            | 4.5           | 38           | 2.0           |
| SS2    | June  | 20           | 9.3           | 26           | 3.5           |
| SS2    | July  | 36           | 0.5           | 33           | 0.6           |
| SS21   | June  | -6           | 23.5          | 2            | 12.7          |
| SS21   | July  | -12          | 5.0           | -21          | 4.3           |
| SS32   | June  | 23           | 8.3           | 24           | 3.1           |
| SS32   | July  | -26          | 13.4          | -13          | 10.8          |
| SS56   | June  | 29           | 7.7           | 31           | 1.5           |
| SS56   | July  | 23           | 2.2           | 31           | 2.7           |
| SS57   | June  | 18           | 1.8           | 34           | 7.0           |
| SS57   | July  | 33           | 1.4           | 35           | 0.3           |
| SS66   | June  | 4            | 2.4           | -6           | 3.9           |
| SS66   | July  | -32          | 10.5          | -26          | 7.0           |
| SS67   | June  | 11           | 3.4           | 24           | 1.9           |
| SS67   | July  | -30          | 15.6          | -30          | 12.7          |
| SS68   | June  | 3            | 2.8           | 12           | 3.7           |
| SS68   | July  | 27           | 0.9           | 27           | 1.8           |
| SS8    | June  | 33           | 5.8           | 35           | 1.5           |
| SS8    | July  | 33           | 0.5           | 36           | 0.3           |
| SS85   | June  | 41           | 15.5          | 45           | 0.2           |
| SS85   | July  | 41           | 58.4          | 42           | 4.8           |
| SS86   | June  | 30           | 3.2           | 34           | 3.5           |

---

|       |      |     |      |     |      |
|-------|------|-----|------|-----|------|
| SS86  | July | 33  | 0.2  | 37  | 0.2  |
| SS901 | June | 12  | 4.8  | 17  | 3.9  |
| SS901 | July | -24 | 34.0 | -3  | 3.2  |
| SS903 | June | 8   | 8.4  | 17  | 2.4  |
| SS903 | July | 22  | 11.8 | 19  | 7.0  |
| SS904 | June | 7   | 11.8 | 8   | 24.8 |
| SS904 | July | -24 | 6.6  | -5  | 7.8  |
| SS905 | June | 0   | 14.5 | 12  | 8.6  |
| SS905 | July | -23 | 7.2  | 7   | 8.0  |
| SS906 | June | -8  | 15.7 | -6  | 2.6  |
| SS906 | July | -20 | 0.3  | -11 | 1.1  |

---
